# Supplementary material for: Discriminatory analysis based molecular docking study for in silico identification of epigallocatechin-3-gallate (EGCG) derivatives as B-RafV600E inhibitors
Source: Royal Society of Chemistry journal article supplement (doi:10.1039/c7ra04788f), 2017-01-01
Supplement: c7ra04788f1.pdf [file c7ra04788f1.pdf]

## **Discriminatory Analysis Based Molecular Docking Study for in Silico Identification of Epigallocatechin-3-Gallate (EGCG) Derivatives as B-Raf<sup>V600E</sup> Inhibitors**

Huazhou Ying<sup>a</sup>, Jiangfeng Xie<sup>a</sup>, Xingguo Liu<sup>c</sup>, Tingting Yao<sup>a</sup>, Xiaowu Dong<sup>a,\*</sup>, Chunqi Hu<sup>a,b,\*</sup>

<sup>a</sup>Zhejiang Province Key Laboratory of Anti-Cancer Drug Research, College of Pharmaceutical Sciences, Zhejiang University, Hangzhou, P. R. China

<sup>b</sup>College of chemistry & chemical engineering, Shaoxing University, Shaoxing, P. R. China

<sup>c</sup>School of Chemical Engineering and Light Industry, Guangdong University of Technology, Guangzhou, P. R. China

\*Corresponding authors: Tel. (Fax.): +86 571 88981051; E-mail: dongxw@zju.edu.cn (X.-W.D.)

Tel. (Fax.):+86 575 88341521; E-mail: hucq@usx.edu.cn (C.-Q.H.)

### **Table of Contents**

|                  |            |
|------------------|------------|
| <b>Table S1.</b> | <b>S2</b>  |
| <b>Table S2.</b> | <b>S13</b> |

**Table S1. The RMSD value to initial conformation and the distance of key interaction between amino acids and compound B2 during molecular simulation**

| Time (ps) | RMSD to Initial conformation | Asn580  | Ser465  | Thr529  | Asp594  |
|-----------|------------------------------|---------|---------|---------|---------|
| 1         | 0                            | 2.10309 | 1.85221 | 2.48572 | 2.16216 |
| 2         | 0.327081                     | 2.27527 | 1.90372 | 2.47689 | 2.07962 |
| 3         | 0.342812                     | 2.33681 | 2.02199 | 2.30957 | 2.35817 |
| 4         | 0.343872                     | 2.12421 | 2.17086 | 2.13705 | 2.191   |
| 5         | 0.346473                     | 2.04436 | 2.2064  | 2.2984  | 2.16941 |
| 6         | 0.361804                     | 2.30169 | 1.96946 | 2.30806 | 2.32111 |
| 7         | 0.377348                     | 2.14015 | 2.04723 | 2.63601 | 2.33673 |
| 8         | 0.378959                     | 2.19714 | 1.86436 | 2.59542 | 2.33941 |
| 9         | 0.403311                     | 2.05692 | 1.95564 | 2.4586  | 2.3151  |
| 10        | 0.386298                     | 2.30969 | 1.99075 | 2.4914  | 2.29592 |
| 11        | 0.397295                     | 2.14794 | 1.88706 | 2.43406 | 2.29961 |
| 12        | 0.403206                     | 2.2597  | 2.05866 | 2.23453 | 2.63771 |
| 13        | 0.425985                     | 1.99367 | 1.8216  | 2.4793  | 2.16245 |
| 14        | 0.424949                     | 2.22958 | 2.08595 | 2.32972 | 2.57492 |
| 15        | 0.420985                     | 2.04932 | 2.03613 | 2.1566  | 2.28165 |
| 16        | 0.428006                     | 2.37268 | 2.17165 | 2.25382 | 2.09109 |
| 17        | 0.44374                      | 2.57857 | 2.18199 | 2.02578 | 2.28809 |
| 18        | 0.461298                     | 2.38295 | 2.33961 | 2.31787 | 2.32384 |
| 19        | 0.463659                     | 2.23533 | 1.94589 | 2.09096 | 2.01865 |
| 20        | 0.442608                     | 2.08376 | 1.95388 | 2.12831 | 2.0538  |
| 21        | 0.415041                     | 2.30278 | 1.93484 | 2.05323 | 2.11558 |
| 22        | 0.45242                      | 2.44341 | 2.19115 | 2.19706 | 2.12907 |
| 23        | 0.470275                     | 2.06969 | 2.13713 | 2.04279 | 2.19415 |
| 24        | 0.463664                     | 2.47542 | 2.17328 | 2.03173 | 2.19333 |
| 25        | 0.439221                     | 2.1609  | 2.10421 | 2.1064  | 2.04231 |
| 26        | 0.45647                      | 2.24185 | 2.13757 | 2.05182 | 2.05004 |
| 27        | 0.445968                     | 2.14823 | 1.80823 | 1.97233 | 2.32369 |
| 28        | 0.454061                     | 2.24229 | 2.16958 | 2.16958 | 2.29769 |
| 29        | 0.468596                     | 2.27876 | 1.94845 | 2.16554 | 2.51288 |
| 30        | 0.48711                      | 2.32084 | 2.27101 | 2.199   | 2.13955 |
| 31        | 0.466004                     | 2.1425  | 1.97261 | 2.3051  | 2.02298 |
| 32        | 0.481056                     | 2.24167 | 2.14702 | 2.15872 | 2.22733 |
| 33        | 0.47124                      | 2.22818 | 2.07575 | 1.95185 | 2.18552 |
| 34        | 0.487767                     | 2.13711 | 1.98497 | 2.1792  | 2.09457 |
| 35        | 0.478126                     | 2.1226  | 1.96071 | 2.19193 | 2.07845 |
| 36        | 0.489124                     | 2.19834 | 2.3395  | 2.1322  | 2.29731 |
| 37        | 0.478334                     | 2.20779 | 1.87697 | 2.19705 | 2.24515 |
| 38        | 0.507639                     | 1.98629 | 1.95304 | 2.18616 | 2.08055 |
| 39        | 0.510523                     | 2.14559 | 2.18184 | 2.11182 | 2.05124 |
| 40        | 0.527983                     | 2.20072 | 2.00368 | 1.85411 | 2.31741 |
| 41        | 0.479647                     | 2.15526 | 2.11314 | 2.04782 | 2.13128 |
| 42        | 0.493319                     | 2.4617  | 2.10269 | 2.11853 | 2.15132 |

---

|    |          |         |         |         |         |
|----|----------|---------|---------|---------|---------|
| 43 | 0.496812 | 2.13599 | 2.12774 | 2.05702 | 2.36619 |
| 44 | 0.488574 | 2.07637 | 2.07591 | 2.00125 | 2.13739 |
| 45 | 0.486903 | 2.20556 | 2.26019 | 2.05634 | 2.02211 |
| 46 | 0.497694 | 2.25032 | 1.97118 | 2.02305 | 2.50498 |
| 47 | 0.497628 | 2.1004  | 2.09665 | 2.11484 | 2.46131 |
| 48 | 0.514364 | 2.16533 | 1.78571 | 2.24609 | 2.1308  |
| 49 | 0.506773 | 2.10827 | 2.17804 | 2.1323  | 2.31522 |
| 50 | 0.518464 | 2.03888 | 1.8555  | 2.02162 | 2.3283  |
| 51 | 0.522408 | 2.18155 | 1.97466 | 1.90258 | 2.14131 |
| 52 | 0.520529 | 2.15232 | 2.07749 | 2.34469 | 2.30942 |
| 53 | 0.505798 | 2.29996 | 2.31668 | 2.30286 | 2.42123 |
| 54 | 0.505895 | 2.15308 | 1.92651 | 2.19193 | 2.07158 |
| 55 | 0.536841 | 2.007   | 2.01226 | 2.04488 | 2.10934 |
| 56 | 0.546971 | 2.36911 | 2.02542 | 2.04264 | 2.08296 |
| 57 | 0.562872 | 2.25079 | 2.13627 | 2.0024  | 2.27886 |
| 58 | 0.55261  | 2.18643 | 2.26862 | 2.06138 | 2.43409 |
| 59 | 0.554626 | 2.245   | 2.15965 | 1.90339 | 2.16006 |
| 60 | 0.551587 | 2.29973 | 2.06972 | 2.07259 | 2.34849 |
| 61 | 0.571252 | 2.2716  | 2.13079 | 2.40114 | 2.22754 |
| 62 | 0.607678 | 2.24166 | 1.97995 | 2.15699 | 2.40491 |
| 63 | 0.567959 | 2.26998 | 2.11118 | 2.22569 | 2.25665 |
| 64 | 0.572572 | 2.12101 | 1.97295 | 2.10942 | 2.16215 |
| 65 | 0.579539 | 2.13954 | 1.95533 | 2.1933  | 2.27311 |
| 66 | 0.569807 | 2.23901 | 2.06156 | 2.13701 | 2.32566 |
| 67 | 0.569025 | 2.13698 | 2.12125 | 2.06354 | 2.07879 |
| 68 | 0.572006 | 2.25165 | 1.8012  | 2.11974 | 2.40414 |
| 69 | 0.590473 | 2.30758 | 1.91109 | 1.98195 | 2.314   |
| 70 | 0.592807 | 2.15851 | 2.04781 | 2.07435 | 2.17654 |
| 71 | 0.578991 | 2.15316 | 1.89188 | 1.99444 | 2.02362 |
| 72 | 0.564587 | 2.0828  | 2.09007 | 2.12615 | 2.69626 |
| 73 | 0.562127 | 2.07517 | 2.13703 | 2.19211 | 2.29231 |
| 74 | 0.568081 | 2.2322  | 1.93741 | 2.11543 | 2.36029 |
| 75 | 0.565109 | 2.22899 | 2.04479 | 2.18293 | 2.27492 |
| 76 | 0.578589 | 2.29843 | 2.36726 | 1.94663 | 2.30149 |
| 77 | 0.580521 | 2.07189 | 2.10981 | 2.0802  | 2.21423 |
| 78 | 0.565116 | 2.13638 | 1.99176 | 2.26233 | 2.06933 |
| 79 | 0.564714 | 2.07994 | 2.04704 | 2.13513 | 1.99177 |
| 80 | 0.600336 | 2.10877 | 2.20788 | 2.06477 | 2.20916 |
| 81 | 0.576447 | 1.87797 | 2.30584 | 2.16135 | 2.16286 |
| 82 | 0.573538 | 2.07854 | 2.06409 | 2.11634 | 2.44338 |
| 83 | 0.579197 | 2.04208 | 2.14183 | 2.06013 | 2.35638 |
| 84 | 0.580457 | 1.87888 | 1.97802 | 2.20957 | 2.54202 |
| 85 | 0.57048  | 1.88479 | 1.98002 | 2.292   | 2.07255 |
| 86 | 0.588566 | 2.29331 | 1.97505 | 1.94879 | 2.32715 |
| 87 | 0.588419 | 2.1691  | 1.85857 | 1.97258 | 2.14501 |
| 88 | 0.588176 | 2.19134 | 2.13252 | 2.04401 | 2.48473 |
| 89 | 0.589969 | 2.0435  | 2.06268 | 1.92482 | 2.25432 |

---

---

|     |          |         |         |         |         |
|-----|----------|---------|---------|---------|---------|
| 90  | 0.575708 | 2.37484 | 1.80872 | 2.0538  | 2.21982 |
| 91  | 0.562014 | 2.13375 | 2.29161 | 1.93574 | 2.30225 |
| 92  | 0.572795 | 2.10376 | 2.19221 | 2.0328  | 2.39053 |
| 93  | 0.596169 | 2.20914 | 2.1254  | 2.05661 | 2.17017 |
| 94  | 0.581682 | 2.21374 | 2.13686 | 2.19232 | 2.12777 |
| 95  | 0.580252 | 2.21551 | 2.27592 | 2.03049 | 2.08014 |
| 96  | 0.555971 | 2.21147 | 1.86168 | 2.08073 | 2.14338 |
| 97  | 0.585844 | 2.1389  | 2.09245 | 1.87973 | 1.97121 |
| 98  | 0.588514 | 2.10455 | 2.11708 | 2.06418 | 2.21667 |
| 99  | 0.616093 | 2.08905 | 2.05866 | 1.89207 | 2.21912 |
| 100 | 0.578307 | 2.14691 | 1.96038 | 1.96841 | 2.36804 |
| 101 | 0.607153 | 2.18471 | 2.0684  | 1.98311 | 2.42231 |
| 102 | 0.590724 | 2.10993 | 1.88972 | 1.83447 | 2.29183 |
| 103 | 0.568244 | 2.16994 | 2.05582 | 1.92446 | 2.18765 |
| 104 | 0.604553 | 2.24608 | 1.96512 | 2.05129 | 2.06826 |
| 105 | 0.575962 | 2.04352 | 1.93824 | 1.95416 | 2.15461 |
| 106 | 0.586333 | 2.14698 | 1.89765 | 2.13683 | 2.3792  |
| 107 | 0.584148 | 2.23512 | 1.90323 | 2.34969 | 2.25361 |
| 108 | 0.567647 | 2.28405 | 1.98788 | 2.13974 | 2.14051 |
| 109 | 0.597374 | 2.01528 | 2.02585 | 1.92105 | 2.103   |
| 110 | 0.578845 | 2.02258 | 2.07903 | 2.24195 | 2.46049 |
| 111 | 0.577741 | 2.34616 | 1.95801 | 1.95763 | 2.296   |
| 112 | 0.584363 | 2.27748 | 2.14644 | 2.03744 | 2.08675 |
| 113 | 0.589352 | 2.35648 | 2.2949  | 2.0469  | 2.31306 |
| 114 | 0.574492 | 1.87337 | 2.18464 | 2.36545 | 2.32089 |
| 115 | 0.584733 | 2.26471 | 1.99317 | 1.93499 | 2.04    |
| 116 | 0.578872 | 2.23656 | 2.01605 | 2.00317 | 2.10448 |
| 117 | 0.583543 | 2.06055 | 2.02125 | 1.94813 | 2.27852 |
| 118 | 0.573665 | 2.2461  | 2.23505 | 1.95584 | 2.34943 |
| 119 | 0.591416 | 1.87012 | 2.05096 | 2.04622 | 2.24566 |
| 120 | 0.610862 | 2.0085  | 2.04653 | 2.08909 | 2.22897 |
| 121 | 0.575994 | 1.91187 | 1.91154 | 1.90346 | 2.17847 |
| 122 | 0.572932 | 2.08954 | 1.89458 | 2.08487 | 2.05044 |
| 123 | 0.57941  | 2.21212 | 1.91071 | 2.04312 | 2.18577 |
| 124 | 0.577481 | 2.2573  | 1.96674 | 2.10067 | 2.05276 |
| 125 | 0.575834 | 2.21389 | 1.90143 | 1.9695  | 2.44876 |
| 126 | 0.562963 | 2.17509 | 1.89155 | 2.166   | 2.37354 |
| 127 | 0.587655 | 2.22346 | 2.15609 | 2.03353 | 2.19466 |
| 128 | 0.5658   | 2.0839  | 2.0018  | 2.23453 | 2.12667 |
| 129 | 0.586401 | 2.07063 | 2.0353  | 2.11275 | 2.55331 |
| 130 | 0.552523 | 2.40862 | 2.11806 | 2.34276 | 2.17393 |
| 131 | 0.568518 | 1.97637 | 2.11659 | 2.26949 | 2.30358 |
| 132 | 0.573388 | 2.10281 | 2.0404  | 2.16751 | 2.32774 |
| 133 | 0.557372 | 2.01041 | 1.9734  | 2.02656 | 2.15873 |
| 134 | 0.562452 | 2.14083 | 1.908   | 2.16727 | 2.40506 |
| 135 | 0.587844 | 1.99834 | 2.37056 | 1.96822 | 2.1488  |
| 136 | 0.572841 | 2.17763 | 2.10404 | 2.23062 | 2.17839 |

---

---

|     |          |         |         |         |         |
|-----|----------|---------|---------|---------|---------|
| 137 | 0.581347 | 2.11607 | 2.25636 | 1.97309 | 2.39833 |
| 138 | 0.568914 | 2.24592 | 1.8305  | 2.54122 | 2.80559 |
| 139 | 0.592272 | 2.30909 | 2.06973 | 2.13735 | 2.09732 |
| 140 | 0.585661 | 1.93514 | 2.01869 | 2.2796  | 2.39506 |
| 141 | 0.571246 | 2.05149 | 2.09866 | 2.00379 | 2.25985 |
| 142 | 0.58007  | 1.98964 | 1.85532 | 1.96671 | 2.17897 |
| 143 | 0.57534  | 2.04355 | 2.20001 | 2.20732 | 2.1978  |
| 144 | 0.575734 | 2.28744 | 2.21283 | 2.13509 | 2.23519 |
| 145 | 0.567947 | 2.13489 | 2.48113 | 2.03787 | 2.50066 |
| 146 | 0.557105 | 1.97883 | 2.03889 | 2.04774 | 2.32629 |
| 147 | 0.590294 | 1.93305 | 1.90199 | 2.01643 | 2.19518 |
| 148 | 0.587607 | 2.14936 | 1.97228 | 2.06472 | 2.13572 |
| 149 | 0.577064 | 2.02262 | 1.80309 | 2.01498 | 2.13364 |
| 150 | 0.574358 | 2.06281 | 2.16207 | 2.15411 | 2.07316 |
| 151 | 0.57377  | 1.96434 | 1.79221 | 1.94495 | 2.13049 |
| 152 | 0.589599 | 2.18602 | 2.09961 | 2.1836  | 2.16874 |
| 153 | 0.558175 | 2.05117 | 2.08063 | 1.99082 | 2.26008 |
| 154 | 0.584048 | 2.07322 | 1.84502 | 2.31034 | 2.45471 |
| 155 | 0.578117 | 2.03166 | 2.11643 | 2.07211 | 2.28295 |
| 156 | 0.604928 | 2.22272 | 2.10537 | 2.24214 | 2.16024 |
| 157 | 0.587372 | 2.25381 | 1.96721 | 2.13017 | 2.12893 |
| 158 | 0.566907 | 2.18148 | 2.16264 | 1.98094 | 2.25047 |
| 159 | 0.58275  | 2.04906 | 2.11722 | 1.79558 | 2.0201  |
| 160 | 0.592276 | 1.86335 | 2.10419 | 2.02514 | 2.11115 |
| 161 | 0.575853 | 1.89503 | 1.88323 | 2.01669 | 2.10808 |
| 162 | 0.584481 | 1.99778 | 1.95479 | 2.10799 | 2.43948 |
| 163 | 0.586614 | 2.15053 | 2.3199  | 2.21559 | 2.3187  |
| 164 | 0.59267  | 2.30144 | 2.17638 | 1.86836 | 2.02993 |
| 165 | 0.603243 | 2.1147  | 2.26278 | 1.92182 | 2.37442 |
| 166 | 0.593837 | 2.09142 | 2.24961 | 2.10366 | 2.27166 |
| 167 | 0.588854 | 2.3195  | 2.05255 | 1.94935 | 2.21849 |
| 168 | 0.58193  | 2.23799 | 1.99853 | 2.12606 | 2.14271 |
| 169 | 0.601458 | 2.08112 | 2.17642 | 1.98457 | 2.34346 |
| 170 | 0.577146 | 2.17283 | 1.91001 | 1.95742 | 2.26382 |
| 171 | 0.603622 | 2.09188 | 1.91228 | 1.99445 | 2.26793 |
| 172 | 0.582985 | 2.05233 | 1.94186 | 1.92741 | 2.19942 |
| 173 | 0.578078 | 2.08074 | 2.01774 | 1.99479 | 2.11061 |
| 174 | 0.572824 | 1.90099 | 1.85983 | 2.0947  | 2.26264 |
| 175 | 0.572617 | 1.96765 | 1.90547 | 2.16658 | 2.08891 |
| 176 | 0.582412 | 2.14629 | 2.05745 | 2.3667  | 2.20821 |
| 177 | 0.59613  | 1.89213 | 1.93382 | 2.12425 | 2.25046 |
| 178 | 0.573288 | 2.29762 | 1.90053 | 2.09449 | 2.27116 |
| 179 | 0.582387 | 2.43018 | 2.05393 | 1.79402 | 2.43723 |
| 180 | 0.607444 | 2.16694 | 2.08811 | 1.9112  | 2.24866 |
| 181 | 0.576488 | 2.14531 | 1.90857 | 2.04965 | 2.37617 |
| 182 | 0.59711  | 2.19943 | 1.99405 | 2.13507 | 2.19416 |
| 183 | 0.580663 | 2.03904 | 2.05064 | 1.95858 | 2.35789 |

---

---

|     |          |         |         |         |         |
|-----|----------|---------|---------|---------|---------|
| 184 | 0.606024 | 2.18969 | 2.09953 | 2.01516 | 2.15183 |
| 185 | 0.598531 | 2.04769 | 2.16976 | 2.12785 | 2.19443 |
| 186 | 0.59113  | 2.00429 | 1.87532 | 2.13418 | 2.0132  |
| 187 | 0.611974 | 2.08415 | 2.28241 | 1.95722 | 2.08471 |
| 188 | 0.563025 | 2.16296 | 2.30296 | 1.85401 | 2.1187  |
| 189 | 0.586163 | 2.02897 | 2.07063 | 2.17132 | 2.11101 |
| 190 | 0.598072 | 1.89611 | 1.93759 | 1.95441 | 2.17832 |
| 191 | 0.585573 | 2.2872  | 2.05313 | 2.0654  | 2.4874  |
| 192 | 0.587632 | 2.03977 | 2.03388 | 1.91062 | 2.44384 |
| 193 | 0.577284 | 1.87776 | 2.0068  | 1.99877 | 2.1708  |
| 194 | 0.584273 | 2.00124 | 2.03973 | 1.89972 | 2.26383 |
| 195 | 0.599001 | 2.16449 | 2.1594  | 2.0486  | 2.44968 |
| 196 | 0.613103 | 2.17657 | 1.86876 | 1.95525 | 2.19755 |
| 197 | 0.579989 | 2.07827 | 2.07025 | 1.91881 | 2.29328 |
| 198 | 0.594641 | 2.15125 | 2.03146 | 1.85036 | 2.19204 |
| 199 | 0.603645 | 2.17093 | 2.06109 | 1.90754 | 2.16934 |
| 200 | 0.576534 | 2.1736  | 2.1262  | 2.28404 | 2.30104 |
| 201 | 0.612111 | 2.21594 | 2.14544 | 1.9189  | 2.32676 |
| 202 | 0.582857 | 2.13304 | 1.81816 | 2.27399 | 2.41088 |
| 203 | 0.579415 | 1.94277 | 1.98159 | 2.14679 | 2.48037 |
| 204 | 0.59151  | 2.09775 | 2.1517  | 2.16109 | 2.14206 |
| 205 | 0.577699 | 1.96673 | 2.17131 | 2.11135 | 2.21394 |
| 206 | 0.600785 | 2.04161 | 1.88286 | 1.91501 | 2.25669 |
| 207 | 0.590139 | 2.06743 | 2.08539 | 2.05091 | 2.38257 |
| 208 | 0.594016 | 1.93692 | 2.09428 | 2.40359 | 2.27686 |
| 209 | 0.581285 | 2.09455 | 1.85986 | 2.10525 | 2.22601 |
| 210 | 0.587768 | 2.29876 | 2.07144 | 2.03075 | 2.36202 |
| 211 | 0.581022 | 2.27489 | 2.00855 | 2.10461 | 2.14472 |
| 212 | 0.602213 | 2.0271  | 1.91405 | 2.02347 | 2.29431 |
| 213 | 0.587671 | 1.9624  | 2.0071  | 2.05668 | 2.24051 |
| 214 | 0.598327 | 1.84428 | 1.87894 | 2.1531  | 2.10916 |
| 215 | 0.582532 | 2.01714 | 1.93229 | 1.95451 | 2.10072 |
| 216 | 0.583901 | 2.26022 | 2.06314 | 2.01521 | 2.30638 |
| 217 | 0.597256 | 1.90808 | 1.89597 | 1.94419 | 2.23243 |
| 218 | 0.591472 | 2.0085  | 1.84877 | 2.06956 | 2.14723 |
| 219 | 0.579394 | 2.08885 | 1.82622 | 2.10307 | 2.53825 |
| 220 | 0.580305 | 2.08424 | 1.98261 | 2.23324 | 2.18855 |
| 221 | 0.565861 | 2.13102 | 1.88236 | 2.12113 | 2.13695 |
| 222 | 0.59276  | 2.18671 | 2.09503 | 2.00777 | 2.24974 |
| 223 | 0.579384 | 2.16802 | 1.93052 | 1.74886 | 2.18639 |
| 224 | 0.589932 | 1.872   | 1.9924  | 2.08953 | 2.17081 |
| 225 | 0.580012 | 2.26403 | 2.0047  | 1.87845 | 2.16665 |
| 226 | 0.584097 | 2.13611 | 2.25619 | 2.26959 | 2.40524 |
| 227 | 0.576354 | 2.21234 | 1.91377 | 2.1583  | 2.46422 |
| 228 | 0.56112  | 2.22444 | 1.99968 | 2.17269 | 2.22094 |
| 229 | 0.59774  | 2.217   | 2.0067  | 1.88096 | 2.40314 |
| 230 | 0.595066 | 2.04647 | 2.10982 | 2.12683 | 2.27647 |

---

---

|     |          |         |         |         |         |
|-----|----------|---------|---------|---------|---------|
| 231 | 0.565931 | 1.99556 | 1.95377 | 2.02354 | 2.18203 |
| 232 | 0.623375 | 1.98008 | 2.30546 | 1.94145 | 1.91651 |
| 233 | 0.583632 | 2.27349 | 2.09585 | 2.07348 | 2.23611 |
| 234 | 0.591011 | 2.14043 | 1.97894 | 1.97431 | 2.20945 |
| 235 | 0.595602 | 2.15274 | 1.8826  | 1.97914 | 2.22628 |
| 236 | 0.589564 | 2.02778 | 1.8753  | 2.06411 | 2.08794 |
| 237 | 0.576789 | 1.93778 | 2.01437 | 2.0709  | 2.2391  |
| 238 | 0.580074 | 2.20302 | 1.99081 | 2.06377 | 2.19943 |
| 239 | 0.58801  | 2.23194 | 2.24364 | 2.05063 | 2.21979 |
| 240 | 0.603867 | 1.99767 | 1.83129 | 2.17124 | 2.49221 |
| 241 | 0.610649 | 2.07704 | 1.76896 | 1.93531 | 2.02281 |
| 242 | 0.571716 | 1.94157 | 2.17673 | 2.1719  | 2.36976 |
| 243 | 0.583108 | 2.17829 | 1.92617 | 2.00652 | 2.34506 |
| 244 | 0.587883 | 2.27098 | 2.01242 | 2.08687 | 2.21106 |
| 245 | 0.600741 | 1.94247 | 1.93195 | 2.00309 | 2.11032 |
| 246 | 0.592717 | 2.0417  | 2.03543 | 2.02013 | 2.18053 |
| 247 | 0.623393 | 1.97981 | 2.20724 | 1.9453  | 1.97061 |
| 248 | 0.596654 | 2.16886 | 2.01326 | 2.14891 | 2.10236 |
| 249 | 0.614295 | 2.03175 | 1.92154 | 2.02186 | 2.2272  |
| 250 | 0.605565 | 2.07288 | 2.0089  | 2.11326 | 2.44465 |
| 251 | 0.630305 | 2.15265 | 2.00591 | 2.02624 | 2.16142 |
| 252 | 0.599055 | 1.9208  | 1.98006 | 1.96423 | 2.18896 |
| 253 | 0.614021 | 2.05326 | 1.9409  | 2.02771 | 2.18144 |
| 254 | 0.598225 | 2.03252 | 2.13534 | 2.0633  | 2.11452 |
| 255 | 0.596374 | 2.33578 | 2.26422 | 2.14335 | 2.48853 |
| 256 | 0.58162  | 2.24026 | 1.98542 | 2.1266  | 2.10554 |
| 257 | 0.591744 | 2.03289 | 2.1473  | 2.00397 | 2.2147  |
| 258 | 0.584496 | 2.31338 | 1.90715 | 1.93636 | 2.20364 |
| 259 | 0.612276 | 2.29974 | 1.88664 | 1.93287 | 2.22408 |
| 260 | 0.590275 | 2.15418 | 1.98321 | 1.96491 | 2.08248 |
| 261 | 0.589835 | 1.99956 | 1.87559 | 1.9372  | 2.46559 |
| 262 | 0.5862   | 2.05922 | 2.12155 | 2.04993 | 2.45896 |
| 263 | 0.581088 | 1.93437 | 1.85189 | 2.15165 | 2.3288  |
| 264 | 0.577288 | 2.10392 | 1.9179  | 2.10508 | 2.18889 |
| 265 | 0.596772 | 2.01982 | 1.79491 | 2.24544 | 2.22313 |
| 266 | 0.589787 | 2.08782 | 2.08754 | 2.03263 | 2.34241 |
| 267 | 0.594633 | 2.01586 | 1.76653 | 1.99682 | 2.34656 |
| 268 | 0.577346 | 2.21528 | 2.05427 | 1.81648 | 2.36617 |
| 269 | 0.582516 | 2.18521 | 2.03294 | 2.06781 | 2.13284 |
| 270 | 0.596213 | 2.3052  | 2.06769 | 2.20596 | 2.34971 |
| 271 | 0.58114  | 2.16765 | 2.02339 | 1.92848 | 2.28803 |
| 272 | 0.587242 | 2.02801 | 1.91659 | 1.97094 | 2.38698 |
| 273 | 0.581629 | 2.15086 | 1.91117 | 2.20307 | 2.26912 |
| 274 | 0.591295 | 2.25483 | 2.30258 | 1.937   | 2.37532 |
| 275 | 0.584695 | 2.22732 | 2.01482 | 1.96447 | 2.11904 |
| 276 | 0.584256 | 2.0769  | 1.87591 | 1.97105 | 2.10862 |
| 277 | 0.589374 | 2.16193 | 2.16229 | 2.04723 | 2.49716 |

---

---

|     |          |         |         |         |         |
|-----|----------|---------|---------|---------|---------|
| 278 | 0.60268  | 2.13811 | 1.98181 | 1.96006 | 2.24944 |
| 279 | 0.598858 | 2.13018 | 2.20687 | 2.00689 | 2.50441 |
| 280 | 0.605166 | 1.99001 | 1.85308 | 1.9822  | 2.62131 |
| 281 | 0.593502 | 2.12075 | 1.98931 | 1.95917 | 2.17454 |
| 282 | 0.602931 | 2.29692 | 1.96872 | 2.0434  | 2.24506 |
| 283 | 0.594474 | 2.18616 | 2.04599 | 2.01561 | 2.27162 |
| 284 | 0.60766  | 2.11253 | 1.98079 | 2.25019 | 2.26622 |
| 285 | 0.584226 | 2.05    | 2.04594 | 1.92485 | 2.4673  |
| 286 | 0.601981 | 1.83029 | 2.10158 | 1.96091 | 2.15725 |
| 287 | 0.583622 | 1.93384 | 1.86421 | 1.98412 | 2.18457 |
| 288 | 0.595517 | 2.04609 | 1.78872 | 2.08491 | 2.1251  |
| 289 | 0.567625 | 1.98992 | 2.03195 | 2.23604 | 2.17039 |
| 290 | 0.59081  | 1.93235 | 1.95331 | 2.05698 | 2.47579 |
| 291 | 0.590672 | 2.17946 | 1.80968 | 1.8805  | 2.60994 |
| 292 | 0.592101 | 1.96351 | 2.02977 | 1.90813 | 2.18108 |
| 293 | 0.57651  | 1.97996 | 1.95373 | 2.14424 | 2.34801 |
| 294 | 0.591593 | 2.21002 | 2.16487 | 1.9839  | 2.09417 |
| 295 | 0.602219 | 2.12131 | 2.03627 | 1.84434 | 2.20892 |
| 296 | 0.577211 | 2.2059  | 2.07634 | 1.87591 | 2.39943 |
| 297 | 0.579664 | 2.13548 | 1.9687  | 2.0956  | 2.13139 |
| 298 | 0.588983 | 2.05352 | 2.03083 | 1.95622 | 2.47406 |
| 299 | 0.601428 | 2.22582 | 2.19072 | 1.92237 | 2.29103 |
| 300 | 0.599579 | 2.05294 | 2.13586 | 1.8979  | 2.65733 |
| 301 | 0.606018 | 2.04779 | 1.94566 | 1.9443  | 2.03053 |
| 302 | 0.601818 | 2.03102 | 2.15274 | 2.16671 | 2.26049 |
| 303 | 0.58456  | 2.2656  | 1.91906 | 2.0901  | 2.21328 |
| 304 | 0.576331 | 1.99168 | 1.97091 | 2.10505 | 2.43787 |
| 305 | 0.576632 | 2.05634 | 1.88761 | 2.10114 | 2.20035 |
| 306 | 0.599302 | 2.11251 | 2.04007 | 2.18187 | 2.17233 |
| 307 | 0.587141 | 2.34398 | 1.897   | 2.10941 | 2.33535 |
| 308 | 0.588559 | 2.06498 | 1.86149 | 2.08886 | 2.41477 |
| 309 | 0.590702 | 2.22322 | 2.05478 | 2.11561 | 2.25595 |
| 310 | 0.59281  | 2.03306 | 1.90336 | 2.19821 | 2.38008 |
| 311 | 0.592335 | 2.13269 | 2.04564 | 1.93513 | 2.30365 |
| 312 | 0.579915 | 2.28459 | 1.98389 | 1.98568 | 2.25713 |
| 313 | 0.581451 | 2.1997  | 2.01282 | 2.05003 | 2.20993 |
| 314 | 0.614787 | 2.08457 | 2.09711 | 1.95171 | 2.04291 |
| 315 | 0.596354 | 2.19617 | 1.92351 | 1.96543 | 2.16833 |
| 316 | 0.608998 | 2.12487 | 1.96703 | 2.01377 | 2.12404 |
| 317 | 0.59565  | 2.18241 | 1.9511  | 1.92245 | 2.29885 |
| 318 | 0.611073 | 2.20742 | 2.24474 | 1.91154 | 2.23768 |
| 319 | 0.593987 | 2.11914 | 2.0029  | 2.12726 | 2.53693 |
| 320 | 0.588794 | 2.01392 | 1.90895 | 2.18696 | 2.23515 |
| 321 | 0.603079 | 1.9482  | 1.93728 | 1.99149 | 2.24187 |
| 322 | 0.60559  | 2.23472 | 2.07414 | 2.03355 | 2.40794 |
| 323 | 0.601664 | 2.22177 | 2.18005 | 1.99033 | 2.34535 |
| 324 | 0.599449 | 2.10105 | 2.15606 | 1.98181 | 2.38012 |

---



---

|     |          |         |         |         |         |
|-----|----------|---------|---------|---------|---------|
| 325 | 0.602735 | 2.17141 | 2.09703 | 2.08768 | 2.33767 |
| 326 | 0.57459  | 2.19315 | 2.17195 | 2.07313 | 2.61659 |
| 327 | 0.589479 | 2.20557 | 1.9794  | 2.05839 | 2.11221 |
| 328 | 0.581432 | 2.37359 | 2.05787 | 2.03041 | 2.30037 |
| 329 | 0.581915 | 2.28358 | 1.88979 | 1.90983 | 2.23928 |
| 330 | 0.589309 | 2.29296 | 1.98938 | 2.09383 | 2.28806 |
| 331 | 0.601279 | 2.11831 | 1.93852 | 1.98295 | 2.35262 |
| 332 | 0.58359  | 2.0257  | 1.90418 | 2.09394 | 2.28926 |
| 333 | 0.617834 | 2.05866 | 2.12519 | 1.98977 | 2.49707 |
| 334 | 0.609174 | 2.20701 | 2.12814 | 2.049   | 2.42393 |
| 335 | 0.609362 | 1.98749 | 1.9708  | 2.00545 | 2.09981 |
| 336 | 0.566792 | 2.17776 | 1.89455 | 2.05781 | 2.45348 |
| 337 | 0.582374 | 2.27128 | 2.03119 | 2.01201 | 2.42084 |
| 338 | 0.604167 | 2.21835 | 2.21622 | 1.96184 | 2.53348 |
| 339 | 0.584545 | 2.20831 | 2.03658 | 2.01843 | 2.18552 |
| 340 | 0.604843 | 2.09451 | 1.9329  | 2.04063 | 2.1904  |
| 341 | 0.600415 | 2.04803 | 2.08676 | 1.9308  | 2.14386 |
| 342 | 0.586627 | 2.08343 | 2.01413 | 1.85829 | 2.18238 |
| 343 | 0.593319 | 2.01946 | 1.88388 | 1.98028 | 2.31269 |
| 344 | 0.606989 | 2.06356 | 1.93372 | 2.12387 | 2.05705 |
| 345 | 0.594944 | 2.06767 | 2.11434 | 1.89048 | 2.44206 |
| 346 | 0.587222 | 2.20357 | 1.89954 | 1.99912 | 2.14305 |
| 347 | 0.575766 | 2.13726 | 1.98968 | 2.22558 | 2.26609 |
| 348 | 0.605955 | 2.07813 | 1.99239 | 1.94055 | 2.02148 |
| 349 | 0.586437 | 2.22475 | 2.17151 | 1.97116 | 2.40681 |
| 350 | 0.587039 | 2.22599 | 1.92881 | 2.09337 | 2.43068 |
| 351 | 0.594467 | 2.10421 | 1.9568  | 1.80037 | 2.17541 |
| 352 | 0.618785 | 1.94842 | 2.02483 | 2.12804 | 2.25848 |
| 353 | 0.578948 | 2.21667 | 2.08364 | 2.05323 | 2.48462 |
| 354 | 0.599458 | 2.24991 | 2.00769 | 1.92998 | 2.12937 |
| 355 | 0.597371 | 2.40029 | 2.04023 | 1.89157 | 2.31158 |
| 356 | 0.584388 | 2.07064 | 2.29941 | 2.08484 | 2.49413 |
| 357 | 0.618703 | 2.21768 | 1.92644 | 2.05509 | 2.14686 |
| 358 | 0.603929 | 2.05504 | 2.08637 | 2.08933 | 2.25177 |
| 359 | 0.593166 | 1.93159 | 2.02416 | 2.13211 | 2.18411 |
| 360 | 0.603791 | 2.26859 | 1.92153 | 1.90749 | 2.21462 |
| 361 | 0.578154 | 2.1599  | 1.97808 | 1.99763 | 2.31091 |
| 362 | 0.571092 | 2.2006  | 1.94743 | 1.89767 | 2.37833 |
| 363 | 0.599975 | 2.10321 | 2.17874 | 1.87403 | 2.20133 |
| 364 | 0.60235  | 2.19898 | 1.88922 | 2.13303 | 1.9305  |
| 365 | 0.593747 | 2.09246 | 1.83565 | 2.12192 | 2.35424 |
| 366 | 0.57897  | 2.37487 | 1.82862 | 1.86093 | 2.2768  |
| 367 | 0.585013 | 2.20282 | 2.19866 | 1.84108 | 2.14539 |
| 368 | 0.579132 | 2.08519 | 1.98491 | 1.88665 | 2.24285 |
| 369 | 0.587829 | 2.08374 | 1.93827 | 2.04303 | 2.26943 |
| 370 | 0.585952 | 1.98854 | 2.13358 | 2.1755  | 2.26534 |
| 371 | 0.579709 | 1.98088 | 2.23098 | 2.03572 | 2.3189  |

---

---

|     |          |         |         |         |         |
|-----|----------|---------|---------|---------|---------|
| 372 | 0.600422 | 2.1896  | 2.08884 | 1.92451 | 2.26193 |
| 373 | 0.593104 | 2.01082 | 2.13177 | 1.93302 | 2.2355  |
| 374 | 0.608281 | 1.9746  | 1.97474 | 1.93762 | 2.45411 |
| 375 | 0.59967  | 1.94418 | 2.19838 | 1.99548 | 2.39522 |
| 376 | 0.604617 | 2.23956 | 1.8448  | 1.89799 | 2.28393 |
| 377 | 0.583167 | 2.05859 | 2.15791 | 2.01219 | 2.20491 |
| 378 | 0.592724 | 2.08163 | 1.88879 | 2.16852 | 2.22124 |
| 379 | 0.593878 | 2.08796 | 2.06017 | 2.00306 | 2.33478 |
| 380 | 0.562002 | 2.09803 | 2.05435 | 2.03153 | 2.16806 |
| 381 | 0.59693  | 2.31569 | 1.86315 | 2.03281 | 2.25973 |
| 382 | 0.585615 | 2.27688 | 2.0613  | 2.01483 | 2.2115  |
| 383 | 0.568549 | 2.22097 | 2.10969 | 1.99629 | 2.39685 |
| 384 | 0.589486 | 2.05005 | 2.13753 | 2.06568 | 2.04302 |
| 385 | 0.574781 | 2.05616 | 2.0457  | 2.00523 | 2.4582  |
| 386 | 0.613944 | 2.02994 | 2.04426 | 2.00605 | 2.07002 |
| 387 | 0.605885 | 1.87174 | 1.98373 | 2.08912 | 2.22936 |
| 388 | 0.58327  | 2.08461 | 2.05426 | 2.02183 | 2.34895 |
| 389 | 0.569199 | 2.09948 | 2.31918 | 2.13213 | 2.16181 |
| 390 | 0.609639 | 2.08351 | 1.93625 | 1.97106 | 2.23103 |
| 391 | 0.584726 | 2.177   | 1.87353 | 2.03556 | 2.24527 |
| 392 | 0.591024 | 2.29022 | 2.00194 | 2.03414 | 2.03512 |
| 393 | 0.552061 | 2.057   | 1.83007 | 1.90922 | 2.4703  |
| 394 | 0.600118 | 2.06761 | 1.94491 | 1.94822 | 2.12961 |
| 395 | 0.586646 | 2.09199 | 1.82197 | 1.95179 | 2.27387 |
| 396 | 0.580697 | 2.15823 | 1.98502 | 2.08999 | 2.33177 |
| 397 | 0.584429 | 2.05298 | 2.16356 | 1.9608  | 2.14341 |
| 398 | 0.592416 | 2.31144 | 2.15329 | 1.95169 | 2.3614  |
| 399 | 0.589432 | 2.17313 | 1.86301 | 2.04814 | 2.64385 |
| 400 | 0.61046  | 1.92172 | 2.20885 | 1.90015 | 2.03056 |
| 401 | 0.60764  | 2.25941 | 2.05477 | 2.13898 | 2.0202  |
| 402 | 0.599913 | 2.21642 | 1.82487 | 2.24246 | 2.10977 |
| 403 | 0.597503 | 2.13991 | 2.05404 | 1.83737 | 2.31613 |
| 404 | 0.602186 | 2.17643 | 2.12221 | 2.0912  | 2.28596 |
| 405 | 0.592845 | 2.2644  | 2.208   | 2.0448  | 2.17124 |
| 406 | 0.604005 | 2.36417 | 1.86159 | 2.01813 | 2.21473 |
| 407 | 0.584573 | 2.09884 | 1.98417 | 2.06293 | 2.2751  |
| 408 | 0.607821 | 2.13311 | 2.05469 | 2.1061  | 2.20433 |
| 409 | 0.590755 | 2.35363 | 2.03297 | 2.13683 | 2.46618 |
| 410 | 0.595399 | 2.17265 | 2.02398 | 2.09413 | 2.29864 |
| 411 | 0.601986 | 2.07209 | 1.87706 | 1.94877 | 2.0893  |
| 412 | 0.609514 | 2.28354 | 2.29989 | 1.97074 | 2.52058 |
| 413 | 0.584473 | 2.06244 | 2.0217  | 2.28907 | 2.31684 |
| 414 | 0.610135 | 2.20235 | 1.85096 | 1.93341 | 2.35807 |
| 415 | 0.581469 | 2.08829 | 2.14988 | 2.12386 | 2.27738 |
| 416 | 0.588275 | 2.25463 | 2.08684 | 2.08638 | 2.34909 |
| 417 | 0.600488 | 2.36514 | 2.00378 | 2.01155 | 2.61463 |
| 418 | 0.588339 | 2.21791 | 1.97127 | 2.12041 | 2.14843 |

---

---

|     |          |         |         |         |         |
|-----|----------|---------|---------|---------|---------|
| 419 | 0.596832 | 2.15615 | 1.85795 | 1.91338 | 2.31745 |
| 420 | 0.575909 | 2.16861 | 2.01696 | 1.95995 | 2.06671 |
| 421 | 0.593825 | 2.01953 | 2.15694 | 2.03557 | 2.17271 |
| 422 | 0.575055 | 2.42585 | 2.21008 | 1.94241 | 2.22131 |
| 423 | 0.576201 | 2.12983 | 1.91979 | 2.03499 | 2.41116 |
| 424 | 0.571877 | 2.07018 | 2.19958 | 2.24206 | 2.44792 |
| 425 | 0.57976  | 2.0948  | 1.96954 | 1.9175  | 2.34408 |
| 426 | 0.572091 | 2.14661 | 1.81516 | 1.99206 | 2.33105 |
| 427 | 0.589089 | 2.26727 | 1.92483 | 2.0706  | 2.44418 |
| 428 | 0.559261 | 2.32759 | 2.01163 | 1.98501 | 2.3497  |
| 429 | 0.591722 | 2.13604 | 2.11866 | 1.91191 | 2.26798 |
| 430 | 0.602458 | 2.17137 | 2.22031 | 2.05612 | 2.07805 |
| 431 | 0.581478 | 2.12284 | 1.99865 | 1.85195 | 2.29282 |
| 432 | 0.56861  | 2.10823 | 1.8465  | 2.02722 | 2.52823 |
| 433 | 0.588664 | 2.03535 | 1.92276 | 2.09333 | 2.22557 |
| 434 | 0.599784 | 2.25969 | 1.88675 | 2.03395 | 2.31453 |
| 435 | 0.588952 | 2.28444 | 2.29936 | 2.22649 | 2.16867 |
| 436 | 0.615237 | 2.07953 | 2.12878 | 1.93647 | 2.36419 |
| 437 | 0.593487 | 1.97979 | 1.81649 | 1.89991 | 2.27325 |
| 438 | 0.604788 | 1.91715 | 1.91689 | 1.97625 | 2.46634 |
| 439 | 0.58695  | 2.1893  | 1.8739  | 1.93395 | 2.32607 |
| 440 | 0.587477 | 2.3239  | 2.03042 | 1.95047 | 2.41218 |
| 441 | 0.59166  | 2.16583 | 1.8655  | 1.96044 | 2.14943 |
| 442 | 0.601739 | 2.02504 | 2.00364 | 1.94667 | 2.51119 |
| 443 | 0.593272 | 2.11763 | 1.85985 | 2.03874 | 2.29924 |
| 444 | 0.598757 | 2.25551 | 1.97967 | 2.18775 | 2.5386  |
| 445 | 0.594592 | 2.23676 | 2.06741 | 1.99106 | 2.36012 |
| 446 | 0.624326 | 2.07549 | 1.98259 | 2.05594 | 2.24458 |
| 447 | 0.596905 | 2.24441 | 2.10018 | 2.20258 | 2.12074 |
| 448 | 0.596369 | 2.40489 | 2.31696 | 2.09084 | 2.30958 |
| 449 | 0.598628 | 2.25935 | 2.01474 | 1.95733 | 2.26486 |
| 450 | 0.5867   | 2.13376 | 1.88066 | 1.93079 | 2.644   |
| 451 | 0.609225 | 2.09431 | 1.83029 | 1.97273 | 2.4487  |
| 452 | 0.582795 | 2.12355 | 1.87763 | 1.90628 | 2.29278 |
| 453 | 0.587298 | 2.04117 | 2.11648 | 2.17805 | 2.1665  |
| 454 | 0.582928 | 2.32126 | 1.86727 | 2.1818  | 2.33217 |
| 455 | 0.586838 | 2.19306 | 1.82884 | 1.88688 | 2.19404 |
| 456 | 0.572842 | 2.15944 | 1.91327 | 1.99582 | 2.18326 |
| 457 | 0.617299 | 2.26362 | 1.94826 | 2.17859 | 2.10425 |
| 458 | 0.591284 | 2.12674 | 1.97976 | 1.87036 | 2.42033 |
| 459 | 0.597177 | 2.30604 | 1.99323 | 1.88177 | 2.29234 |
| 460 | 0.578619 | 2.29666 | 2.06991 | 1.96666 | 2.25585 |
| 461 | 0.607447 | 2.12751 | 2.00107 | 1.90755 | 2.5642  |
| 462 | 0.590106 | 2.06379 | 1.917   | 2.01751 | 2.16457 |
| 463 | 0.592944 | 2.35688 | 2.04883 | 1.96246 | 2.3217  |
| 464 | 0.581892 | 2.25946 | 2.05039 | 1.94613 | 2.28648 |
| 465 | 0.594702 | 2.03881 | 1.97624 | 2.12818 | 2.07988 |

---

---

|     |          |         |         |         |         |
|-----|----------|---------|---------|---------|---------|
| 466 | 0.574798 | 2.23246 | 2.01655 | 2.33926 | 2.37073 |
| 467 | 0.584243 | 2.21167 | 2.0836  | 2.06763 | 2.40775 |
| 468 | 0.593141 | 2.11401 | 1.89984 | 2.2165  | 2.49589 |
| 469 | 0.59152  | 2.06999 | 1.94518 | 1.86218 | 2.08698 |
| 470 | 0.571294 | 2.28594 | 2.14812 | 1.98995 | 2.35179 |
| 471 | 0.592291 | 2.13853 | 1.92196 | 1.97798 | 2.20943 |
| 472 | 0.604534 | 2.16684 | 1.8349  | 1.98267 | 2.26079 |
| 473 | 0.59794  | 1.88833 | 1.96682 | 1.999   | 2.18734 |
| 474 | 0.594304 | 2.02204 | 2.14597 | 1.93355 | 2.13378 |
| 475 | 0.597586 | 2.09251 | 1.90326 | 2.147   | 2.21506 |
| 476 | 0.596795 | 2.09118 | 2.10238 | 2.05831 | 2.04979 |
| 477 | 0.594761 | 2.15703 | 1.97738 | 1.8834  | 2.27744 |
| 478 | 0.587484 | 2.21642 | 1.96134 | 2.00787 | 2.32094 |
| 479 | 0.591915 | 2.15829 | 1.85568 | 2.00228 | 2.19904 |
| 480 | 0.606416 | 2.06632 | 1.99854 | 2.13536 | 2.31617 |
| 481 | 0.595923 | 2.17558 | 2.1543  | 1.99474 | 2.23842 |
| 482 | 0.603927 | 1.99693 | 2.0837  | 2.01169 | 2.28529 |
| 483 | 0.609366 | 2.11532 | 1.88928 | 1.94782 | 2.26702 |
| 484 | 0.60415  | 2.17744 | 1.97522 | 2.12688 | 2.43127 |
| 485 | 0.605139 | 2.15022 | 2.01351 | 2.1068  | 2.49663 |
| 486 | 0.600905 | 2.08488 | 1.92394 | 1.90661 | 2.27432 |
| 487 | 0.60732  | 2.27292 | 2.23546 | 2.17492 | 2.50076 |
| 488 | 0.619674 | 2.36928 | 1.90226 | 2.06043 | 2.06775 |
| 489 | 0.584152 | 2.2597  | 2.0807  | 1.96463 | 2.26595 |
| 490 | 0.611941 | 2.07896 | 2.01067 | 2.1662  | 2.21646 |
| 491 | 0.611301 | 2.20246 | 2.08912 | 1.9056  | 2.56035 |
| 492 | 0.599522 | 2.11678 | 2.13707 | 1.89683 | 2.21074 |
| 493 | 0.614323 | 2.19071 | 2.00948 | 1.88273 | 2.22573 |
| 494 | 0.631673 | 1.93865 | 2.18468 | 2.14041 | 2.56547 |
| 495 | 0.595308 | 2.14292 | 2.19912 | 1.95708 | 2.32254 |
| 496 | 0.631944 | 2.17691 | 2.1051  | 2.07307 | 2.30456 |
| 497 | 0.60097  | 2.26796 | 1.78054 | 2.07305 | 2.31984 |
| 498 | 0.615924 | 2.16789 | 1.9208  | 2.0056  | 2.40289 |
| 499 | 0.61734  | 2.23757 | 1.82632 | 2.29858 | 2.22715 |
| 500 | 0.597696 | 1.99806 | 1.9138  | 2.04846 | 2.59912 |

---

**Table S2 The calculated interaction Energies between key amino acids with compound B2.**

| Residue | Interaction Energy<br>(kcal/mol) | VDW Interaction Energy<br>(kcal/mol) | Electrostatic Interaction Energy<br>(kcal/mol) |
|---------|----------------------------------|--------------------------------------|------------------------------------------------|
| ILE463  | -0.465755                        | -0.686452                            | 0.220697                                       |
| SER465  | -6.35264                         | -1.03352                             | -5.31912                                       |
| GLY466  | 0.361418                         | 0.511949                             | -0.150531                                      |
| SER467  | -2.19322                         | -1.15918                             | -1.03404                                       |
| GLY469  | -0.383314                        | -0.364588                            | -0.018726                                      |
| VAL471  | -4.01348                         | -3.7658                              | -0.247676                                      |
| ALA481  | 3.91651                          | 2.32972                              | 1.58679                                        |
| VAL482  | -1.93395                         | -0.973147                            | -0.960803                                      |
| LYS483  | -3.02184                         | -4.33051                             | 1.30867                                        |
| LEU505  | -0.666395                        | -0.68215                             | 0.015755                                       |
| THR508  | -0.476311                        | -0.15722                             | -0.319091                                      |
| ILE513  | -1.68874                         | -0.988537                            | -0.7002                                        |
| LEU514  | 0.09377                          | -1.61357                             | 1.70734                                        |
| PHE516  | -1.5932                          | -1.80606                             | 0.212857                                       |
| ILE527  | -2.26064                         | -2.31129                             | 0.050648                                       |
| THR529  | -8.07468                         | -2.96084                             | -5.11384                                       |
| GLN530  | -0.182578                        | -0.311711                            | 0.129133                                       |
| TRP531  | -1.61059                         | -0.807157                            | -0.803432                                      |
| SER536  | -0.867384                        | -0.395526                            | -0.471858                                      |
| HIS574  | -1.69591                         | -0.204016                            | -1.49189                                       |
| LYS578  | 0.357014                         | -0.406427                            | 0.763441                                       |
| ASN580  | -6.35264                         | -2.05672                             | -8.26572                                       |
| ASN581  | -3.98578                         | -0.683102                            | -3.30268                                       |
| PHE583  | -4.27368                         | -3.75329                             | -0.520393                                      |
| ILE592  | -0.285262                        | -0.429245                            | 0.143983                                       |
| GLY593  | -3.43332                         | -1.84039                             | -1.59293                                       |
| ASP594  | -5.08437                         | -2.26056                             | -2.82381                                       |
| PHE595  | -2.10401                         | -2.04291                             | -0.061102                                      |
| GLY596  | -0.38845                         | -0.522046                            | 0.133596                                       |
